# Supplementary material for: Functional metabolomics discover pentose and glucuronate interconversion pathways as promising targets for Yang Huang syndrome treatment with Yinchenhao Tang
Source: PubMed Central journal article supplement — RSC Adv. 2018 Oct 31;8(64):36831–9. doi: 10.1039/c8ra06553e (PMC9089300; doi:10.1039/c8ra06553e), 2018-10-31
Supplement: RA-008-C8RA06553E-s001.pdf [file RA-008-C8RA06553E-s001.pdf]

Table1 Identification results of serum biomarkers in YHS group

| NO | Rt   | m/z<br>determined | m/z<br>calculated | Error<br>(mDa) | Ion<br>form        | Molecular<br>Formula                                          | Metabolite<br>Name                                   | Trend | T'TEST                  |
|----|------|-------------------|-------------------|----------------|--------------------|---------------------------------------------------------------|------------------------------------------------------|-------|-------------------------|
| 1  | 8.73 | 772.5930          | 771.5778          | 0.189          | [M+H] <sup>+</sup> | C <sub>43</sub> H <sub>82</sub> NO <sub>8</sub> P             | PC(15:0/20:2(11Z,14Z))                               | ↓     | 1.594 × E <sup>-3</sup> |
| 2  | 0.60 | 130.0499          | 129.0426          | 0.486          | [M+H] <sup>+</sup> | C <sub>5</sub> H <sub>7</sub> NO <sub>3</sub>                 | Pyroglutamic acid                                    | ↓     | 1.654 × E <sup>-2</sup> |
| 3  | 2.20 | 249.1251          | 248.1161          | 2.912          | [M+H] <sup>+</sup> | C <sub>13</sub> H <sub>16</sub> N <sub>2</sub> O <sub>3</sub> | 6-Hydroxymelatonin                                   | ↑     | 4.540 × E <sup>-5</sup> |
| 4  | 6.25 | 546.3539          | 545.3481          | -2.775         | [M+H] <sup>+</sup> | C <sub>28</sub> H <sub>52</sub> NO <sub>7</sub> P             | LysoPC(20:3(5Z,8Z,11Z))                              | ↓     | 1.466 × E <sup>-6</sup> |
| 5  | 8.19 | 512.5064          | 511.4964          | 3.141          | [M+H] <sup>+</sup> | C <sub>32</sub> H <sub>65</sub> NO <sub>3</sub>               | Cer(d18:0/14:0)                                      | ↓     | 6.952 × E <sup>-9</sup> |
| 6  | 8.78 | 719.5690          | 718.5536          | -1.355         | [M+H] <sup>+</sup> | C <sub>47</sub> H <sub>74</sub> O <sub>5</sub>                | DG(22:4(7Z,10Z,13Z,16Z)/22:5(4Z,7Z,10Z,13Z,16Z)/0:0) | ↓     | 1.981 × E <sup>-2</sup> |
| 7  | 1.98 | 194.0794          | 193.0739          | -0.035         | [M+H] <sup>+</sup> | C <sub>10</sub> H <sub>11</sub> NO <sub>3</sub>               | Phenylacetyl glycine                                 | ↑     | 4.578 × E <sup>-3</sup> |
| 8  | 2.23 | 411.2492          | 410.2433          | -3.366         | [M+H] <sup>+</sup> | C <sub>19</sub> H <sub>39</sub> O <sub>7</sub> P              | LPA(0:0/16:0)                                        | ↑     | 4.933 × E <sup>-2</sup> |
| 9  | 2.69 | 121.0649          | 120.0575          | 0.960          | [M+H] <sup>+</sup> | C <sub>8</sub> H <sub>8</sub> O                               | Phenylacetaldehyde                                   | ↑     | 4.446 × E <sup>-3</sup> |
| 10 | 3.06 | 136.0761          | 135.0684          | 2.714          | [M+H] <sup>+</sup> | C <sub>8</sub> H <sub>9</sub> NO                              | 2-Phenylacetamide                                    | ↑     | 2.989 × E <sup>-2</sup> |
| 11 | 8.31 | 556.5300          | 555.5227          | 0.128          | [M+H] <sup>+</sup> | C <sub>34</sub> H <sub>69</sub> NO <sub>4</sub>               | Cer(t18:0/16:0)                                      | ↑     | 5.923 × E <sup>-3</sup> |
| 12 | 8.89 | 770.5690          | 769.5622          | -0.541         | [M+H] <sup>+</sup> | C <sub>43</sub> H <sub>80</sub> NO <sub>8</sub> P             | PC(15:0/20:3(5Z,8Z,11Z))                             | ↓     | 1.618 × E <sup>-2</sup> |
| 13 | 2.25 | 758.5692          | 757.5622          | -0.306         | [M+H] <sup>+</sup> | C <sub>42</sub> H <sub>80</sub> NO <sub>8</sub> P             | PC(14:0/20:2(11Z,14Z))                               | ↑     | 3.516 × E <sup>-3</sup> |
| 14 | 5.46 | 224.0562          | 223.0481          | 3.917          | [M+H] <sup>+</sup> | C <sub>10</sub> H <sub>9</sub> NO <sub>5</sub>                | 4-(2-Amino-3-hydroxyphenyl)-2,4-dioxobutanoic acid   | ↑     | 2.124 × E <sup>-7</sup> |
| 15 | 6.99 | 538.3877          | 537.3794          | 1.885          | [M+H] <sup>+</sup> | C <sub>27</sub> H <sub>56</sub> NO <sub>7</sub> P             | LysoPE(0:0/22:0)                                     | ↓     | 1.504 × E <sup>-2</sup> |
| 16 | 1.72 | 209.0939          | 208.0848          | -1.470         | [M+H] <sup>+</sup> | C <sub>10</sub> H <sub>12</sub> N <sub>2</sub> O <sub>3</sub> | Formyl-5-hydroxykynurenamine                         | ↑     | 3.473 × E <sup>-4</sup> |
| 17 | 2.32 | 185.0827          | 184.0736          | 2.899          | [M+H] <sup>+</sup> | C <sub>9</sub> H <sub>12</sub> O <sub>4</sub>                 | Vanylglycol                                          | ↑     | 2.157 × E <sup>-3</sup> |
| 18 | 8.34 | 802.6350          | 801.6248          | 4.570          | [M+H] <sup>+</sup> | C <sub>45</sub> H <sub>88</sub> NO <sub>8</sub> P             | PC(15:0/22:1(13Z))                                   | ↓     | 1.049 × E <sup>-3</sup> |
| 19 | 1.90 | 163.0383          | 164.0473          | 1.601          | [M-H] <sup>-</sup> | C <sub>9</sub> H <sub>8</sub> O <sub>3</sub>                  | Phenylpyruvic acid                                   | ↑     | 3.070 × E <sup>-4</sup> |

|    |      |          |          |        |        |                                                   |                                      |   |                         |
|----|------|----------|----------|--------|--------|---------------------------------------------------|--------------------------------------|---|-------------------------|
| 20 | 1.98 | 193.0349 | 194.0427 | -2.627 | [M-H]- | C <sub>6</sub> H <sub>10</sub> O <sub>7</sub>     | D-Glucuronic acid                    | ↑ | 4.211 × E <sup>-2</sup> |
| 21 | 8.49 | 790.5418 | 791.5465 | 3.185  | [M-H]- | C <sub>45</sub> H <sub>78</sub> NO <sub>8</sub> P | PC(15:0/22:6(4Z,7Z,10Z,13Z,16Z,19Z)) | ↑ | 4.768 × E <sup>-2</sup> |
| 22 | 6.19 | 480.3096 | 481.3168 | 0.038  | [M-H]- | C <sub>23</sub> H <sub>48</sub> NO <sub>7</sub> P | LysoPC(15:0)                         | ↓ | 1.101 × E <sup>-2</sup> |

↑ : YHS vs Control; ↓ : YHS vs Control

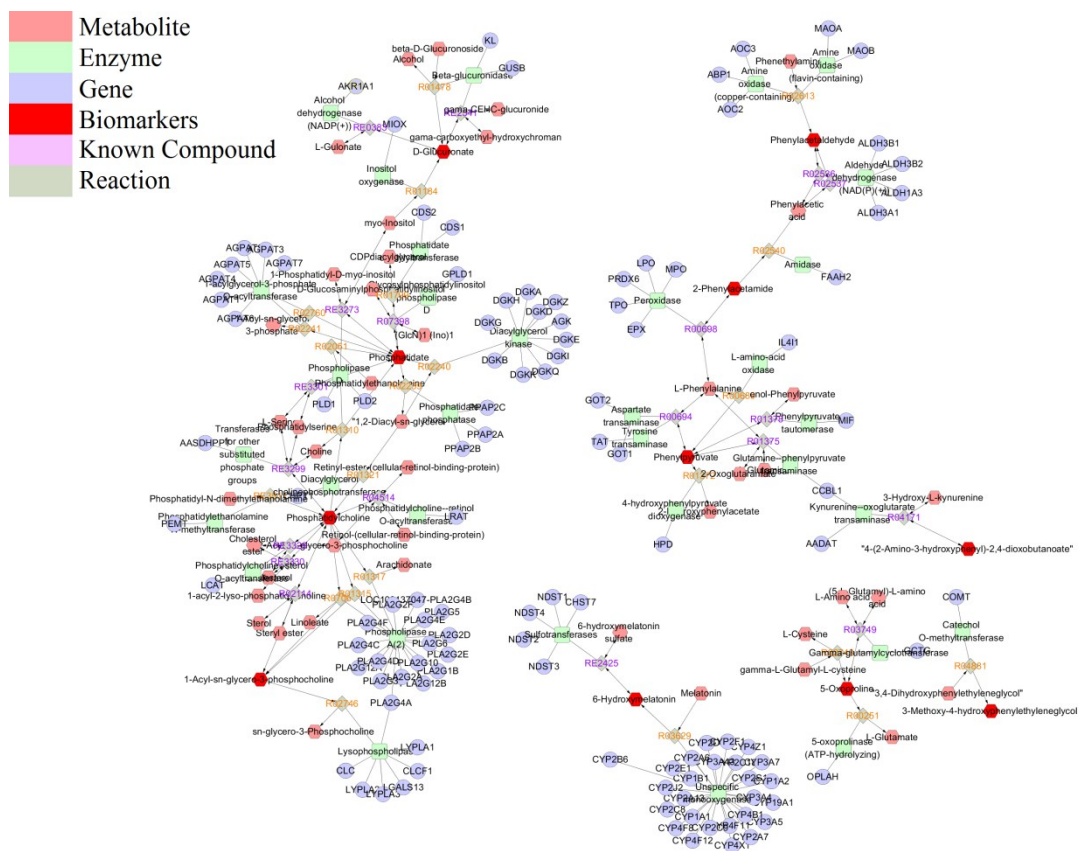

Fig. S1 Construction of the altered metabolic network associated YHS mice based on KEGG pathway database.
